# Supplementary material for: Testing marine regional-scale hypotheses along the Yucatan continental shelf using soft-bottom macrofauna
Source: PeerJ. 2020 Jan 2;8:e8227. doi: 10.7717/peerj.8227 (PMC6942678; doi:10.7717/peerj.8227)
Supplement: Supplemental Information 1 — Data points indicate collected abundance of specimens with the corresponding code of functional traits (first column, 46 files) at each sample (following 1,017 columns). Factors used for analyses on the bottom (files 49 to 52). [file peerj-08-8227-s003.xlsx]

## Sheet: Yucatan_Functional_trait_assemb
	2010A1R1	2010A2R1	2010A2R2	2010A2R3	2010A3R1	2010A3R2	2010A3R3	2010A4R1	2010A4R2	2010A4R3	2010A5R1	2010A5R2	2010A5R3	2010B10R1	2010B10R2	2010B6R1	2010B6R2	2010B6R3	2010B7R1	2010B7R2	2010B7R3	2010B8R1	2010B8R2	2010B8R3	2010B9R1	2010B9R2	2010B9R3	2010C11R1	2010C11R2	2010C11R3	2010C12 R1	2010C12 R2	2010C12 R3	2010C13R1	2010C13R2	2010C13R3	2010C14R1	2010C14R2	2010C14R3	2010C15R1	2010C15R2	2010C15R3	2010D16R1	2010D16R2	2010D17R1	2010D17R2	2010D17R3	2010D18R1	2010D18R2
ft:10001010001010000	1	0	3	2	0	0	0	0	0	0	5	0	1	0	1	3	3	3	0	0	2	1	1	1	2	2	2	1	9	6	1	4	3	0	1	0	0	1	1	0	0	0	0	0	0	0	0	0	0
ft:10001010001000100	6	0	0	0	0	0	0	0	1	0	4	0	1	0	0	14	22	17	0	0	1	0	2	0	0	0	0	8	3	9	0	0	0	0	0	2	1	0	0	0	0	0	4	0	0	1	0	0	0
ft:10001010001000001	1	1	0	0	0	0	0	0	0	0	0	1	0	1	0	0	15	5	0	0	0	0	1	0	0	0	0	1	0	0	1	0	1	0	0	0	0	0	0	0	0	0	0	0	0	0	0	0	0
ft:10001010001100000	1	0	0	0	0	0	0	0	0	0	1	0	0	0	0	10	24	4	0	0	0	0	0	0	0	0	0	2	0	4	1	0	0	0	1	0	0	0	0	0	0	0	0	0	0	0	0	0	0
ft:10001010001000110	0	1	0	1	0	0	0	0	0	0	0	0	0	0	0	0	0	0	0	0	1	0	1	0	3	0	2	0	0	0	0	0	1	0	0	0	0	0	0	0	0	0	0	0	0	1	0	0	0
ft:10001010001010100	0	0	0	0	0	0	0	0	0	0	0	0	0	0	0	1	0	0	0	0	0	0	0	0	0	0	0	0	0	1	0	0	0	0	0	0	0	0	0	0	0	0	0	0	0	0	0	0	0
ft:10001010001001000	0	0	0	0	1	0	0	0	0	0	0	2	0	1	0	2	0	4	0	0	0	1	0	0	0	0	1	2	2	2	0	1	0	1	0	0	0	0	0	0	0	0	0	0	0	0	1	0	0
ft:00110010010100000	0	0	0	0	0	0	0	0	0	0	0	0	0	0	0	0	0	0	0	0	0	0	0	0	0	0	0	0	0	0	0	0	0	0	0	0	0	0	0	0	0	0	0	0	0	0	0	0	0
ft:00110010100010000	0	6	2	1	0	0	0	0	0	0	1	0	0	0	0	1	6	3	0	0	0	0	0	0	1	0	0	2	1	0	1	1	1	0	2	0	0	0	0	0	0	0	3	0	0	0	1	0	0
ft:00110010100001000	0	0	0	0	0	0	0	0	0	0	0	0	0	0	0	0	1	0	0	0	0	0	0	0	0	0	0	1	4	0	1	0	0	0	1	0	0	0	0	0	0	0	1	0	0	0	0	0	0
ft:00110010100100000	1	0	0	0	0	0	0	0	0	0	0	0	0	0	0	1	8	4	0	0	0	0	0	0	0	0	0	0	0	0	0	0	0	0	0	0	0	0	0	0	0	0	1	0	0	0	0	0	0
ft:00110010100000001	0	0	0	0	0	0	0	0	0	0	0	0	0	0	0	1	1	2	0	0	0	0	0	0	0	0	0	0	0	0	0	0	0	0	0	0	0	0	0	0	0	0	0	0	0	0	0	0	0
ft:00110010100000100	0	0	0	0	0	0	0	0	0	0	0	0	0	0	0	0	0	0	0	0	0	0	0	0	0	0	0	0	0	0	0	0	0	0	0	0	0	0	0	0	0	0	0	0	0	0	0	0	0
ft:00110010100010100	0	0	0	0	0	0	0	0	0	0	0	0	0	0	0	0	0	0	0	0	1	0	0	0	0	0	0	0	0	0	0	1	1	0	0	0	0	0	0	0	0	0	0	0	0	0	0	0	0
ft:00110010010000001	0	0	0	0	0	0	0	0	0	0	0	0	0	0	0	0	0	1	0	0	0	0	0	0	0	0	0	0	0	0	0	0	1	0	0	0	0	0	0	0	0	1	1	0	0	0	0	0	0
ft:00110010010010000	0	0	0	0	0	0	0	0	0	0	0	0	0	0	0	0	0	0	0	0	0	0	0	0	0	0	0	0	0	0	0	0	0	0	0	0	0	0	0	0	0	0	0	0	0	0	0	0	0
ft:00110010010000101	0	0	0	0	0	0	0	0	0	0	0	0	0	0	0	0	0	0	0	0	0	0	0	0	0	0	0	0	0	0	0	0	0	0	0	0	0	0	0	0	0	0	0	0	0	0	0	0	0
ft:00110010010000100	0	0	0	0	0	0	0	0	0	0	0	0	0	0	0	2	17	1	0	0	0	0	0	0	0	0	0	1	0	0	0	0	0	0	1	0	0	0	0	0	0	0	0	0	0	0	0	0	0
ft:00110010010001000	0	0	0	0	0	0	0	0	0	0	0	0	0	0	0	0	0	0	0	0	0	0	0	0	0	0	0	0	0	0	0	0	0	0	0	0	0	0	0	0	0	0	0	0	0	0	0	0	0
ft:00110010010000110	0	0	0	0	0	0	0	0	0	0	0	0	0	0	0	0	0	0	0	0	0	0	0	0	0	0	0	0	0	0	0	0	0	0	0	0	0	0	0	0	0	0	0	0	0	0	0	0	0
ft:00110010100010001	0	0	0	0	0	0	0	0	0	0	0	0	0	0	0	0	0	1	0	0	0	0	0	0	0	0	0	0	0	0	0	0	0	0	0	0	0	0	0	0	0	0	0	0	0	0	0	0	0
ft:00110001010000100	0	0	0	0	0	0	0	0	0	0	0	0	0	0	0	0	0	0	0	0	0	0	0	0	0	0	0	0	0	0	0	0	0	0	0	0	0	0	0	0	0	0	0	0	0	0	0	0	0
ft:00110001010010000	1	0	0	0	0	0	0	0	0	0	1	0	0	0	0	0	1	1	0	0	0	0	0	0	0	1	0	0	1	0	0	0	0	0	0	0	0	0	0	0	0	0	0	0	0	0	0	0	0
ft:00110010010100010	0	0	0	0	0	0	0	0	0	0	0	0	0	0	0	0	0	0	0	0	0	0	0	0	0	0	0	0	0	0	0	0	0	0	0	0	0	0	0	0	0	0	0	0	0	0	0	0	0
ft:00110010010000000	0	0	0	0	0	0	0	0	0	0	0	0	0	0	0	0	0	0	0	0	0	0	0	0	0	0	0	0	1	0	0	0	0	0	0	0	0	0	0	0	0	0	0	0	0	0	0	0	0
ft:00110010010000010	0	0	0	0	0	0	0	0	0	0	0	0	0	0	0	0	0	0	0	0	0	0	0	0	0	0	0	0	0	0	0	0	0	0	0	0	0	0	0	0	0	0	0	0	0	0	0	0	0
ft:00110010010100100	0	0	0	0	0	0	0	0	0	0	0	0	0	0	0	0	0	0	0	0	0	0	0	0	0	0	0	0	0	0	0	0	0	0	0	0	0	0	0	0	0	0	0	0	0	0	0	0	0
ft:00101010001000100	0	0	0	0	0	0	0	0	0	0	0	0	0	0	0	0	0	0	0	0	0	0	0	0	0	0	0	0	0	0	0	0	0	0	0	0	0	0	0	0	0	0	0	0	0	0	0	0	0
ft:00101001001010000	0	0	0	0	0	0	0	0	0	0	0	0	0	0	0	0	0	0	0	0	0	0	0	0	0	0	0	0	0	0	0	0	0	0	0	0	0	0	0	0	0	0	0	0	0	0	0	0	0
ft:00101001001000100	0	0	0	0	0	0	0	0	0	0	0	0	0	0	0	0	0	0	0	0	0	0	0	0	0	0	0	0	0	0	0	0	0	0	0	0	0	0	0	0	0	0	0	0	0	0	0	0	0
ft:00101001001001000	0	0	0	0	0	0	0	0	0	0	0	0	0	0	0	0	0	0	0	0	0	0	0	0	0	0	0	0	0	0	0	0	0	0	0	0	0	0	0	0	0	0	0	0	0	0	0	0	0
ft:10001001001010000	0	0	0	0	0	0	0	0	0	0	0	0	0	0	0	0	0	0	0	0	0	0	0	0	0	0	0	0	0	0	0	0	0	0	0	0	0	0	0	0	1	0	0	0	0	0	0	0	0
ft:00101001001100000	0	0	0	0	0	0	0	0	0	0	0	0	0	0	0	0	0	0	0	0	0	0	0	0	0	0	0	0	0	0	0	0	0	0	0	0	0	0	0	0	0	0	0	0	0	0	0	0	0
ft:00101001001000001	0	0	0	0	0	0	0	0	0	0	0	0	0	0	0	0	0	0	0	0	0	0	0	0	0	0	0	0	0	0	0	0	0	0	0	0	0	0	0	0	0	0	0	0	0	0	0	0	0
ft:00101001001110000	0	0	0	0	0	0	0	0	0	0	0	0	0	0	0	0	0	0	0	0	0	0	0	0	0	0	0	0	0	0	0	0	0	0	0	0	0	0	0	0	0	0	0	0	0	0	0	0	0
ft:01001010001100000	0	0	0	0	0	0	0	0	0	0	1	0	0	0	0	1	1	2	0	0	2	0	0	0	0	0	0	0	0	0	0	0	0	1	0	0	0	0	0	0	0	0	0	0	0	0	0	0	0
ft:01001010001000100	0	0	0	0	0	0	0	0	0	0	0	0	0	0	0	0	0	1	0	0	0	0	0	0	0	0	0	0	0	0	0	0	0	0	0	0	0	0	0	0	0	0	0	0	0	0	0	0	0
ft:01001010001001000	0	0	0	0	0	0	0	0	0	0	0	0	0	0	0	0	0	0	0	0	0	0	0	0	0	0	0	0	2	0	0	0	0	0	0	0	0	0	0	0	0	0	0	0	0	0	0	0	0
ft:01001010001000110	0	0	0	0	0	0	0	0	0	0	0	0	0	0	0	0	0	0	0	0	0	0	0	0	0	0	0	0	0	0	0	0	0	0	0	0	0	0	0	0	0	0	0	0	0	0	0	0	0
ft:01001010001000010	0	0	0	0	0	0	0	0	0	0	0	0	0	0	0	1	2	0	0	0	0	0	0	0	0	0	0	0	1	0	1	0	0	0	0	0	0	0	0	0	0	0	0	0	0	0	0	0	0
ft:01001010001000001	0	0	0	0	0	0	0	0	0	0	0	0	0	0	0	0	0	0	0	0	0	0	0	0	0	0	0	0	0	0	0	0	0	0	0	0	0	0	0	0	0	0	0	0	0	0	0	0	0
ft:01001010001000000	0	0	0	0	0	0	0	0	0	0	0	0	0	0	0	0	0	0	0	0	0	0	0	0	0	0	0	0	0	0	0	0	0	0	0	0	0	0	0	0	0	0	0	0	0	0	0	0	0
ft:01001010001010100	0	0	0	0	0	0	0	0	0	0	0	0	0	0	0	0	0	0	0	0	0	0	0	0	0	0	0	0	0	0	0	0	0	0	0	0	0	0	0	0	0	0	0	0	0	0	0	0	0
ft:01001010001001100	0	0	0	0	0	0	0	0	0	0	0	0	0	0	0	0	0	0	0	0	0	0	0	0	0	0	0	0	0	0	0	0	0	0	0	0	0	0	0	0	0	0	0	0	0	0	0	0	0
ft:01001010001010000	0	0	0	0	0	0	0	0	0	0	0	0	0	0	0	0	0	0	0	0	0	0	0	0	0	0	0	0	0	0	0	0	0	0	0	0	0	0	0	0	0	0	0	0	0	0	0	0	0
ft:01001010001001001	0	0	0	0	0	0	0	0	0	0	0	0	0	0	0	0	0	0	0	0	0	0	0	0	0	0	0	0	0	0	0	0	0	0	0	0	0	0	0	0	0	0	0	0	0	0	0	0	0
Depth (m)	20	50	50	50	92	92	92	90	90	90	35	35	35	188	188	11	11	11	42	42	42	100	100	100	126	126	126	15	15	15	58	58	58	100	100	100	188	188	188	249	249	249	15	15	74	74	74	82	82
Year	2010	2010	2010	2010	2010	2010	2010	2010	2010	2010	2010	2010	2010	2010	2010	2010	2010	2010	2010	2010	2010	2010	2010	2010	2010	2010	2010	2010	2010	2010	2010	2010	2010	2010	2010	2010	2010	2010	2010	2010	2010	2010	2010	2010	2010	2010	2010	2010	2010
Region	W-Yucatan	W-Yucatan	W-Yucatan	W-Yucatan	W-Yucatan	W-Yucatan	W-Yucatan	W-Yucatan	W-Yucatan	W-Yucatan	W-Yucatan	W-Yucatan	W-Yucatan	W-Yucatan	W-Yucatan	W-Yucatan	W-Yucatan	W-Yucatan	W-Yucatan	W-Yucatan	W-Yucatan	W-Yucatan	W-Yucatan	W-Yucatan	W-Yucatan	W-Yucatan	W-Yucatan	W-Yucatan	W-Yucatan	W-Yucatan	W-Yucatan	W-Yucatan	W-Yucatan	W-Yucatan	W-Yucatan	W-Yucatan	W-Yucatan	W-Yucatan	W-Yucatan	W-Yucatan	W-Yucatan	W-Yucatan	W-Yucatan	W-Yucatan	W-Yucatan	W-Yucatan	W-Yucatan	W-Yucatan	W-Yucatan
Stftion	A1	A2	A2	A2	A3	A3	A3	A4	A4	A4	A5	A5	A5	B10	B10	B6	B6	B6	B7	B7	B7	B8	B8	B8	B9	B9	B9	C11	C11	C11	C12	C12	C12	C13	C13	C13	C14	C14	C14	C15	C15	C15	D16	D16	D17	D17	D17	D18	D18
[truncated: 968 more columns]
