# Supplementary material for: Testing marine regional-scale hypotheses along the Yucatan continental shelf using soft-bottom macrofauna
Source: PeerJ. 2020 Jan 2;8:e8227. doi: 10.7717/peerj.8227 (PMC6942678; doi:10.7717/peerj.8227)
Supplement: Table S1 — Abundance is estimated according to depth ranges and regions. [file peerj-08-8227-s001.xlsx]

## Sheet: Hoja2
Abundance, Ind 0.1m2 (mean±se), of a representative sub-set of taxa (60 mostly at species level) of the macrofauna at YCS.
Abundance is estimated according to depth ranges and regions.
		Depth range	10-50 m			50-100 m			> 100m
		Regions	West-Yucatan (n= 116)	Mid-Yucatan (n= 164)	W-Caribbean (n= 112)	West-Yucatan (n= 88)	Mid-Yucatan (n= 147)	W-Caribbean (n= 74)	West-Yucatan (n= 112)	Mid-Yucatan (n= 74)	W-Caribbean (n= 95)
Taxa	Family
Polychaeta	Spionidae	Prionospio cristata	11.75±2.13	19.61±5.55	19.24±5.46	15.57±3.72	3.6±0.95	0.33±0.33	0.29±0.23	0.25±0.17	0.23±0.23
		Prionospio steenstrupi	1.24±0.43	0.43±0.26	0.5±0.5	0.92±0.48	0.3±0.17	0±0	0.07±0.07	0.12±0.12	0.91±0.55
		Prionospio cirrifera	1.17±0.48	0.43±0.34	0.17±0.17	1.01±0.51	0±0	0.33±0.33	0.22±0.22	0.99±0.52	0.91±0.55
		Prionospio dayi	0.48±0.2	0.65±0.65	0.17±0.17	0.74±0.43	0.6±0.42	0±0	0.07±0.07	2.84±1.61	0.23±0.23
		Prionospio dubia	0±0	0.22±0.15	0±0	0.18±0.18	0±0	0±0	0.43±0.27	0.12±0.12	0±0
		Prionospio sp. 1	0.55±0.38	1.08±0.45	0.33±0.24	0.09±0.09	0.2±0.14	3.35±1.77	2.01±0.52	1.36±0.58	0.91±0.71
		Aonidella dayi	0.07±0.07	0.43±0.21	1.17±0.54	0.28±0.16	2.4±0.71	7.03±1.84	0.29±0.14	1.23±0.62	2.04±0.9
		Aonides mayaguezensis	1.31±0.66	1.29±0.58	2.84±0.91	0.09±0.09	0.8±0.4	1±0.74	0.22±0.22	0.12±0.12	0±0
		Laonice cirrata	0.14±0.1	0.11±0.11	0.17±0.17	0.46±0.24	0.4±0.2	0±0	0.14±0.1	0.12±0.12	0±0
		Paraprionospio pinnata	1.52±0.45	2.91±0.98	0.84±0.43	3.69±1.04	1.5±0.58	0±0	0.07±0.07	0±0	0±0
		Spiophanes bombyx	0.07±0.07	0.75±0.32	0.33±0.24	0.18±0.13	0.4±0.2	0.33±0.33	0.14±0.1	0.25±0.25	5.45±1.99
		Exogone dispar	0.14±0.1	0±0	0±0	0.09±0.09	0±0	0±0	0±0	0±0	0±0
	Syllidae	Haplosyllis spongicola	0.48±0.18	0±0	1.17±0.68	0±0	2.2±1.81	0±0	0±0	0±0	0±0
		Syllis ortizi	0.41±0.19	0.32±0.24	4.85±1.51	0±0	0.3±0.22	0±0	0±0	0.12±0.12	0±0
		Sphaerosyllis piriferopsis	0.83±0.36	0.86±0.45	3.35±1.18	0.28±0.16	0.8±0.53	0±0	0.07±0.07	0.25±0.17	0.23±0.23
		Sphaerosyllis sp. 1	0.07±0.07	0.32±0.24	0.5±0.29	0.55±0.29	0.1±0.1	0.33±0.33	0.07±0.07	0.49±0.24	0±0
		Syllis sp. A	0.69±0.27	0.75±0.32	2.17±0.84	0±0	0.5±0.26	0±0	0.07±0.07	0.49±0.3	0.23±0.23
	Cirratulidae	Aphelochaeta sp. 1	63.64±35.5	0.43±0.21	0.84±0.43	0.46±0.2	0.7±0.36	1±0.74	0±0	0.25±0.17	0.45±0.32
	Cirratulidae	Kirkegaardia dorsobranchialis	1.66±0.64	0.75±0.54	1.17±0.54	1.84±0.58	0.3±0.17	1±0.56	1.22±0.56	1.23±0.41	1.59±0.57
	Opheliidae	Armandia agilis	15.55±3.99	10.34±2.98	3.68±1.36	3.41±1.05	1.6±0.43	0.67±0.47	0.43±0.17	0.12±0.12	0.91±0.91
	Opheliidae	Armandia maculata	1.52±0.49	0.97±0.51	0.5±0.37	1.93±0.7	0.6±0.24	0.33±0.33	0±0	0±0	1.14±0.93
	Fabriciidae	Fabricia sp. 1	26.19±6.73	5.93±1.41	4.85±1.45	1.47±0.54	0.8±0.28	0.33±0.33	0.22±0.12	0.12±0.12	1.59±1.38
	Chrysopetalidae	Chrysopetalum sp. 1	4.15±0.89	5.17±1.75	3.35±1.1	0.28±0.21	0.8±0.31	0±0	0±0	0.25±0.17	0±0
	Glyceridae	Glycera sp. 1	1.93±0.55	5.93±1.32	6.02±1.2	0.09±0.09	0.7±0.29	2.34±0.94	0.36±0.16	0.25±0.17	0.68±0.5
	Dorvilleidae	Protodorvillea kefersteini	0.41±0.29	0.97±0.49	11.38±3.05	0.18±0.13	0.7±0.29	0.33±0.33	0±0	0.25±0.17	0.23±0.23
	Eunicidae	Eunice sp. 1	0.83±0.35	0.11±0.11	1±0.62	0.09±0.09	0.3±0.22	0±0	0.5±0.33	0.62±0.32	0±0
	Nereididae	Ceratonereis longicirrata	1.04±0.43	0.32±0.19	3.35±1.2	0.55±0.34	0.3±0.22	0±0	0±0	0±0	0±0
	Onuphidae	Kinbergonuphis simoni	0.35±0.18	1.08±0.45	0.5±0.37	0.74±0.25	0.8±0.34	2.01±0.9	0.57±0.22	0.37±0.21	2.04±0.78
	Paraonidae	Aricidea (Acmira) simplex	2.14±0.67	1.94±0.54	0.67±0.41	2.86±0.96	0.9±0.41	0±0	0.07±0.07	0.37±0.21	0.68±0.39
		Aricidea (Strelzovia) suecica	0.48±0.2	0±0	0±0	2.67±0.94	0.2±0.2	1.67±0.85	0.22±0.12	0.12±0.12	0.45±0.32
		Aricidea sp. 1	0.62±0.31	0.11±0.11	1±0.57	0.37±0.18	0.7±0.29	0±0	0.36±0.16	0.49±0.39	0.68±0.39
		Cirrophorus branchiatus	0.76±0.28	0.32±0.32	0.17±0.17	0.74±0.31	0.8±0.42	1±0.74	0.07±0.07	0.25±0.25	0.45±0.32
		Paradoneis lyra	0.83±0.25	1.62±0.5	3.01±1.03	2.49±0.57	0.8±0.28	1.67±0.71	0±0	0.86±0.36	0.91±0.55
	Pilargidae	Litocorsa antennata	0.97±0.83	1.19±0.59	0.33±0.24	3.41±1.03	3.9±1.07	0±0	2.44±0.5	1.98±0.87	1.36±0.77
	Poecilochaetidae	Poecilochaetus johnsoni	0.07±0.07	0±0	0.5±0.29	0.09±0.09	0.1±0.1	0.33±0.33	0±0	1.48±0.47	0.23±0.23
	Polynoidae	Malmgreniella sp. 1	0.62±0.62	0.32±0.19	0.84±0.43	0±0	0.1±0.1	0±0	0±0	0±0	0±0
	Sabellidae	Paradialychone americana	0.41±0.26	1.29±0.49	0.84±0.55	0.55±0.26	0.3±0.17	0.33±0.33	0.14±0.1	0.62±0.32	0.45±0.32
		Sabella sp. 1	1.04±0.35	0.22±0.22	2.01±0.63	0.74±0.49	0.3±0.22	0±0	0±0	0.49±0.24	0±0
Amphipoda	Aoridae	Bemlos sp. 1	3.11±0.89	4.74±1.95	4.35±1.4	1.29±0.6	0.8±0.4	0±0	0.07±0.07	0.49±0.3	0.68±0.39
		Plesiolembos ovalipes	9.26±5.65	1.94±1.2	2.84±2	0±0	0±0	0±0	0±0	0±0	0±0
	Ampeliscidae	Ampelisca vadorum	2.56±0.95	1.51±0.44	1.34±0.66	0.64±0.27	0.6±0.24	0.33±0.33	0.07±0.07	0.12±0.12	0.23±0.23
	Unciolidae	Rudilemboides naglei	6.5±1.64	6.36±2.98	3.68±1.56	0.37±0.22	0.2±0.14	0±0	0±0	0±0	0.45±0.45
	Bateidae	Batea cuspidata	4.15±1.04	4.31±1.97	1±0.46	0±0	0.5±0.26	0±0	0±0	0±0	0±0
	Chevaliidae	Chevalia carpenteri	0±0	0.54±0.28	5.52±3.03	0±0	4.2±3.16	4.35±3.04	0±0	0±0	0±0
	Maeridae	Meximaera diffidentia	0.14±0.1	13.04±4.44	0.17±0.17	0±0	0.2±0.14	0±0	0±0	0±0	0±0
	Phoxocephalidae	Eobrolgus spinosus	1.52±0.52	0±0	0.67±0.53	1.11±0.38	0.2±0.14	2.34±2.03	0±0	0.12±0.12	0.23±0.23
		Rhepoxynius sp. A	0.83±0.58	0±0	0±0	0±0	0.2±0.2	0±0	0±0	0±0	0±0
Isopoda	Hyssuridae	Xenanthura brevitelson	7.19±1.43	0.97±0.49	0.33±0.24	4.51±1.06	3.6±0.97	0.33±0.33	0.07±0.07	0.49±0.35	0±0
Tanaidacea	Apseudidae	Apseudes sp. A	2.07±0.55	0.86±0.48	7.03±2.9	1.29±0.48	3.3±0.93	1.34±0.64	0.22±0.16	0±0	0.68±0.39
	Leptocheliidae	Alloleptochelia longimana	7.32±3.39	3.45±1.34	3.51±1.63	0±0	1.1±0.62	0±0	0.07±0.07	0±0	0.23±0.23
		Chondrochelia dubia	14.51±4.83	2.16±0.6	15.39±3.74	1.75±0.51	1.9±0.6	2.34±1.51	0.65±0.51	0.12±0.12	0.23±0.23
	Metapseudidae	Calozodion wadei	2.35±0.98	12.93±4.56	5.52±2.95	0.18±0.13	0.7±0.29	0±0	0±0	0.12±0.12	0±0
	Parapseudidae	Parapseudes sp. A	1.04±0.46	0.86±0.5	0.17±0.17	0.28±0.21	0.3±0.22	0±0	0±0	0±0	0±0
Maxillopoda	ND	Harpacticoida (Or)	6.98±1.99	14.22±3.64	16.23±4.39	2.03±0.72	3.2±1.04	0.67±0.47	0.43±0.43	1.36±0.65	0.68±0.39
Ostracoda	Rutidermatidae	Rutiderma af. cohenae	7.12±2	11.31±4.51	1.34±0.66	0±0	1.3±0.55	0±0	0.07±0.07	0.12±0.12	0±0
Decapoda	Alpheidae	Alpheus normanni	0.14±0.1	0±0	0±0	0±0	0±0	0±0	0±0	0±0	0±0
Bivalvia	Corbulidae	Corbula operculata	3.25±1.06	0.97±0.35	0.17±0.17	0.18±0.18	1.1±0.64	0±0	0±0	0±0	0±0
Gastropoda	Caecidae	Caecum pulchellum	7.05±4.47	6.03±3.51	0.33±0.24	0±0	0±0	0±0	0±0	0±0	0±0
Sipunculidea	Sipunculidae	Sipunculidae (F)	2.14±0.45	10.34±5.41	23.09±18.41	2.58±1.16	1.8±0.53	0.67±0.67	1.94±0.43	3.95±1.32	2.5±0.88
	ND	Sipunculidea (Cl)	0.97±0.46	0.86±0.37	3.68±1.75	0.64±0.4	0.3±0.17	0±0	0.29±0.18	0.12±0.12	0±0
